# Supplementary material for: Deep-red electro-fluorescence based on an excimer emission with hot-exciton channels
Source: Royal Society of Chemistry journal article supplement (doi:10.1039/d1tc04920h), 2021-12-16
Supplement: d1tc04920h1.pdf [file d1tc04920h1.pdf]

## Supporting information

### Contents

#### SI-1 Synthesis Procedures

#### SI-2 Experimental Section

#### SI-3 Supplementary Figures and Tables

### SI-1 Synthesis Procedures

#### Synthesis of 9,9-dimethyl-10-[4-(tetramethyl-1,3,2-dioxaborolan-2-yl)phenyl]-9,10-dihydroacridine(B-DMAC) (1)

Potassium acetate(24.3g), 10-(4-bromophenyl)-9,9-dimethyl-9,10-dihydroacridine(7.3g,20mmol) and 4,4,5,5-tetramethyl-2-(tetramethyl-1,3,2-dioxaborolan-2-yl)-1,3,2-dioxaborolane(11.2g,44mmol) were added in a round flask with a stirrer, and the mixture was dissolved in 200ml 1,4-dioxane, then Pd(dppf)Cl<sub>2</sub> (80mg) was added as the catalyst. The mixture was stirred under N<sub>2</sub> atmosphere at 85°C for 36 hours. After the mixture cool to room temperature, 40ml deionized water was added to wash the potassium acetate out, at the same time, used dichloromethane to extract the organic layer. Finally, the column chromatography (dichloromethane: petroleum ether=2:1) was used to gain the product B-DMAC (4.4g, yield=53%).<sup>1</sup>H NMR (500 MHz, DMSO-d<sub>6</sub>) δ 8.04 – 7.94 (m, 2H), 7.50 (dd, J = 7.7, 1.6 Hz, 2H), 7.40 – 7.36 (m, 2H), 6.94 (dtd, J = 27.6, 7.2, 1.4 Hz, 4H), 6.14 (dd, J = 8.2, 1.4 Hz, 2H), 1.62 (s, 6H), 1.36 (s, 12H). HRMS(APCI): m/z calcd for C<sub>27</sub>H<sub>30</sub>BNO<sub>2</sub> [M+H]<sup>+</sup> 411.35; found 410.89.

#### Synthesis of 10-(4-{9-bromonaphtho[2,3-c][1,2,5]thiadiazol-4-yl}phenyl)-9,9-dimethyl-9,10-dihydroacridine (NZ-DMAC) (2)

Potassium carbonate(13.3g), 10-(4-{9-bromonaphtho[2,3-c][1,2,5]thiadiazol-4-yl}phenyl)-9,9-dimethyl-9,10-dihydroacridine(4.4g,10.6mmol) and dibromonaphtho[2,3-c][1,2,5]thiadiazole(3.1g,9mmol) were added in a round flask with a stirrer, and the mixture was dissolved in solution(36ml toluene+24ml THF+24ml

deionized water), then Pd(PPh<sub>3</sub>)<sub>4</sub>(50mg) was added as catalyst. The mixture was stirred under N<sub>2</sub> atmosphere at 90°C for 24 hours. After the mixture cool to room temperature, 30ml deionized water was added to wash the potassium carbonate out, at the same time, used dichloromethane to extract the organic layer. Finally, the column chromatography (dichloromethane: petroleum ether=1:2) was used to obtain the product NZ-DMAC(2.7g, yield=56%). <sup>1</sup>H NMR (500 MHz, DMSO-d<sub>6</sub>) δ 8.47 (d, J = 9.0 Hz, 1H), 8.12 (d, J = 9.0 Hz, 1H), 8.00 – 7.92 (m, 2H), 7.85 – 7.75 (m, 1H), 7.72 – 7.60 (m, 3H), 7.55 (dd, J = 7.8, 1.5 Hz, 2H), 7.10 (ddd, J = 8.5, 7.2, 1.5 Hz, 2H), 6.97 (td, J = 7.5, 1.2 Hz, 2H), 6.41 (dd, J = 8.2, 1.2 Hz, 2H), 1.68 (s, 6H). HRMS(APCI): m/z calcd for C<sub>31</sub>H<sub>22</sub>BrN<sub>3</sub>S [M+H]<sup>+</sup> 548.50; found 548.77.

42

#### 43 **Synthesis of 9,9-dimethyl-10-(4-{9-phenylnaphtho[2,3-c][1,2,5]thiadiazol-4-yl}** 44 **phenyl)-9,10-dihydroacridine (DMAC-NZP) (3)**

Potassium carbonate(4.4g), 10-(4-{9-bromonaphtho[2,3-c][1,2,5]thiadiazol-4-yl}phenyl)-9,9-dimethyl-9,10-dihydroacridine(1.35g,2.5mmol) and boronic acid (3.7g,3mmol) were added in a round flask with a stirrer, and the mixture was dissolved in solution(12ml toluene+8ml THF+8ml deionized water), then Pd(PPh<sub>3</sub>)<sub>4</sub>(15mg) was added as catalyst. The mixture was stirred under N<sub>2</sub> atmosphere at 90°C for 24 hours. After the mixture cool to room temperature, 10ml deionized water was added to wash the potassium carbonate out, at the same time, used dichloromethane to extract the organic layer. Finally, the column chromatography (dichloromethane: petroleum ether=1:3) was used to obtain the product **DMAC-NZP** (764mg, yield=56%). <sup>1</sup>H NMR (500 MHz, DMSO-d<sub>6</sub>) δ 8.12 (d, J = 8.9 Hz, 1H), 7.97 (dd, J = 15.3, 8.6 Hz, 3H), 7.72 – 7.50 (m, 8H), 7.12 (t, J = 7.0 Hz, 1H), 6.98 (t, J = 6.9 Hz, 2H), 6.44 (d, J = 8.2 Hz, 1H), 1.69 (s, 6H). <sup>13</sup>C NMR (126 MHz, CDCl<sub>3</sub>) δ 151.51, 151.24, 141.11, 140.95, 136.44, 133.91, 132.01, 131.32, 131.23, 130.80, 130.24, 129.23, 128.54, 128.39, 127.28, 126.80, 126.76, 126.47, 126.43, 125.20, 120.73, 114.34, 36.07, 31.13, 0.01(TMS). HRMS(APCI): m/z calcd for C<sub>37</sub>H<sub>27</sub>N<sub>3</sub>S [M+H]<sup>+</sup> 545.70; found 544.91. Element Analysis for C<sub>37</sub>H<sub>27</sub>N<sub>3</sub>S: C, 81.44; H, 4.99; N, 7.70; S, 5.87; Found: C, 82.24; H, 4.97; N, 7.68; S, 5.489.

62

63 **Synthesis of 4-{9-[4-(9,9-dimethyl-9,10-dihydroacridin-10-yl) phenyl]**  
64 **naphtho[2,3-c] [1,2,5] thiadiazol-4-yl} benzonitrile (DMAC-NZC) (4)**

65 Potassium carbonate(4.4g), 10-(4-{9-bromonaphtho[2,3-c][1,2,5]thiadiazol-4-  
66 yl}phenyl)-9,9-dimethyl-9,10-dihydroacridine (1.35g,2.5mmol) and (4-  
67 cyanophenyl)boronic acid (4.4g,3mmol) were added in a round flask with a stirrer, and  
68 the mixture was dissolved in solution(12ml toluene+8ml THF+8ml deionized water),  
69 then Pd(PPh<sub>3</sub>)<sub>4</sub>(15mg) was added as catalyst. The mixture was stirred under N<sub>2</sub>  
70 atmosphere at 90°C for 24 hours. After the mixture cool to room temperature, 10ml  
71 deionized water was added to wash the potassium carbonate out, at the same time, used  
72 dichloromethane to extract the organic layer. Finally, the column chromatography  
73 (dichloromethane: petroleum ether=2:1) was used to obtain the product **DMAC-NZC**  
74 (671mg, yield=47%).<sup>1</sup>H NMR (500 MHz, DMSO-d<sub>6</sub>) δ 8.15 (dd, J = 8.3, 1.6 Hz, 3H),  
75 8.04 – 7.96 (m, 2H), 7.91 (dd, J = 13.7, 8.5 Hz, 3H), 7.69 – 7.51 (m, 6H), 7.12 (ddd, J  
76 = 8.5, 7.2, 1.5 Hz, 2H), 6.98 (td, J = 7.4, 1.2 Hz, 2H), 6.44 (dd, J = 8.2, 1.2 Hz, 2H),  
77 1.69 (s, 6H). <sup>13</sup>C NMR (126 MHz, CDCl<sub>3</sub>) δ 151.19, 150.99, 141.42, 140.93, 136.02,  
78 133.88, 132.32, 132.25, 131.88, 131.84, 131.42, 130.66, 130.30, 128.10, 127.40,  
79 127.21, 126.92, 126.48, 126.27, 125.26, 120.81, 118.79, 114.30, 112.23, 36.08, 31.13,  
80 0.01(TMS). HRMS(APCI): m/z calcd for C<sub>38</sub>H<sub>26</sub>N<sub>4</sub>S [M+H]<sup>+</sup> 570.71; found 569.85.  
81 Element Analysis for C<sub>38</sub>H<sub>26</sub>N<sub>4</sub>S: C, 79.97; H, 4.59; N, 9.82; S, 5.62; Found: C, 80.86;  
82 H, 4.58; N, 9.84; S, 5.23.

83

84

85 **SI-2 Experimental Section**

86 **General information (1)**

87 <sup>1</sup>H NMR and <sup>13</sup>C NMR were recorded on a Bruker AVANCZ 500 spectrometer at  
88 500 MHz using deuterated dimethyl sulfoxide (DMSO) as the solvent for <sup>1</sup>H NMR and  
89 CDCl<sub>3</sub> as the solvent for <sup>13</sup>C NMR at 298 K. Tetramethylsilane (TMS) was used as  
90 internal standards. The MALDI-TOF mass spectra were recorded by an AXIMA-  
91 CFRTM plus instrument. The Flash EA 1112, CHNS–O elemental analysis instrument  
92 was chosen to characterize these compounds. Single-crystal diffraction measurements

were performed on a Bruker APEXII CCD system. The crystal structures were solved with direct methods and refined with a full-matrix least-squares technique using the SHELXS programs. All angles and distances in crystals were measured using Mercury 2020.3.0 software. The differential scanning calorimetry (DSC, DSC Q100) PerkinElmer thermal analysis system was set at a heating rate of 10 °C min<sup>-1</sup> and a nitrogen flow rate of 50 mL min<sup>-1</sup>. Thermal gravimetric analysis (TGA) was performed on a Perkin-Elmer thermal analysis system from room temperature to 800 °C with a heating rate of 10 °C min<sup>-1</sup>. UV–vis spectra were recorded using a UV-3100 Spectrophotometer. Steady-state fluorescence spectra and fluorescence lifetimes were measured with a FLS980 spectrometer. Corrected PLQY is obtained by manual operation using an integrating sphere apparatus on FLS980. Cyclic voltammetry (CV) was carried out using BAS 100B/W electrochemical analyzer with standard one-compartment, three-electrode electrochemical cell. A glass-carbon disk electrode was selected as a working electrode. Pt wire was performed as a counter electrode. Ag/Ag<sup>+</sup> was used as a reference electrode with Ferrocene/ferrocenium (Fc/Fc<sup>+</sup>) redox couple was used as the internal standard.

## **Device fabrication and performances (2)**

ITO-coated glass was used as the substrate with a sheet resistance of 20 Ω square<sup>-1</sup>. The ITO glass was cleaned by ultrasonic cleaner with deionized water, isopropyl alcohol, acetone and chloroform. The evaporation rate was controlled to be 0.03–0.1 nm s<sup>-1</sup> for organic layers, 0.01 nm s<sup>-1</sup> for the LiF layer and 0.3 nm s<sup>-1</sup> for the Al layer. The PR650 spectra scan spectrometer was used to record EL spectrum and luminance-current density-voltage was measured by spectrometer with a Keithley model 2400 programmable voltage-current source.

## **Theoretical calculations (3)**

Density functional theory (DFT) and time-dependent DFT (TD-DFT) calculations were used to describe the ground-state and excited-state properties. For all of the calculations in single molecule, optimized ground- and excited-state geometries were obtained at the levels of M06-2X/6-31G(d,p). For all of the dimers, optimized excited-state

geometries were obtained by using the M06-2X hybrid functional at 6-31G(d,p) level. The natural transition orbitals (NTOs) were evaluated with the dominant “particle”–“hole” pair contributions and the associated transition weights. All of the calculations were carried out using Gaussian 09 package on a Power Leader cluster. Furthermore, the Multiwfn software was used to calculate the wave function of electron–hole pair from the transition density matrix (TDM) by TD-DFT and was plotted in a two-dimensional (2D) color-filled map for easily distinguishing the dimer ground- and excited-state character.

130

131

### SI-3 Supplementary Figures and Tables

133

**Table S1.** Lifetimes of DMAC-NZC and DMAC-NZP in different solvents and in different conditions.

| Materials/<br>Lifetimes<br>(ns) | Hexane | n-butyl<br>ether | Ethyl<br>acetate | Tetrahydrofura<br>n | 5wt%<br>PMMA<br>film | crystal |
|---------------------------------|--------|------------------|------------------|---------------------|----------------------|---------|
| DMAC-<br>NZC                    | 6.3    | -                | 1.4              | 1.2                 | 9.9                  | 7.7     |
| DMAC-<br>NZP                    | 11.6   | 12.5             | 2.0              | -                   | 12.5                 | 2.6     |

136

**Table S2.**  $k_r$  and  $k_{nr}$  of DMAC-NZC and DMAC-NZP in different conditions.  $k_r = \text{PLQY}/\text{Lifetimes}$ ,  $k_{nr} = (1-\text{PLQY})/\text{Lifetimes}$ .

|                               | DMAC-NZC |           |         | DMAC-NZP |           |         |
|-------------------------------|----------|-----------|---------|----------|-----------|---------|
|                               | solid    | PMMA film | crystal | solid    | PMMA film | crystal |
| PLQY(%)                       | 4.3      | 71.2      | 3.2     | 35       | 74.9      | 5.7     |
| Lifetimes(ns)                 | 13.4     | 9.9       | 7.7     | 22.2     | 12.5      | 2.6     |
| $k_r(10^8 \text{ s}^{-1})$    | 0.032    | 0.72      | 0.042   | 0.16     | 0.6       | 0.22    |
| $k_{nr}(10^8 \text{ s}^{-1})$ | 0.71     | 0.29      | 1.3     | 0.29     | 0.2       | 3.6     |

139

140

**Table S3.** PLQY of DMAC-NZC and DMAC-NZP in powder, crystal 5% PMMA film, evaporated film and doped-film.

| Materials/PLQY (%) | Powder | Crystal | 5% doped in PMMA | Film | Doped-film |
|--------------------|--------|---------|------------------|------|------------|
| NZC                | 4.3    | 3.2     | 71.2             | 4.2  | 47.3       |
| NZP                | 35     | 5.7     | 74.9             | 9.2  | 28.4       |

143

144

## 145 Data analysis

146 The fluorescence spectrum of luminogens are tested with the Edinburgh's FLs980 (in  
147 solution, in powder, in crystal, in 5% PMMA film). Generally, speaking, the  
148 luminogens which do not have dual-fluorescent phenomenon should not emit two peaks  
149 in the fluorescence spectra. However, most of the tested PL spectra show two emission  
150 peaks. To address this problem, we first measured the lifetimes of luminogen at the two  
151 emission peaks and we find the lifetimes at two peaks are basically same. In Figure  
152 S1(a) and Figure S1(b), the lifetimes of DMAC-NZP in hexane are 11.6 ns and 11.8 ns  
153 at 595 nm and 690 nm, respectively, so that we can consider they are the same, in other  
154 words, the two emission peaks are from the same excited state. Next, the "emission  
155 peak" at about 690 nm does not show any red shift with the increase of solution  
156 polarities (Figure 1b) while the real emission peaks demonstrate obvious red-shifts.  
157 Comparing to the measurements of the other red-emissive materials, we find that the  
158 peak position at 690 nm is caused by the grating defect of the instrument when the  
159 luminance of luminogens is not strong.

160

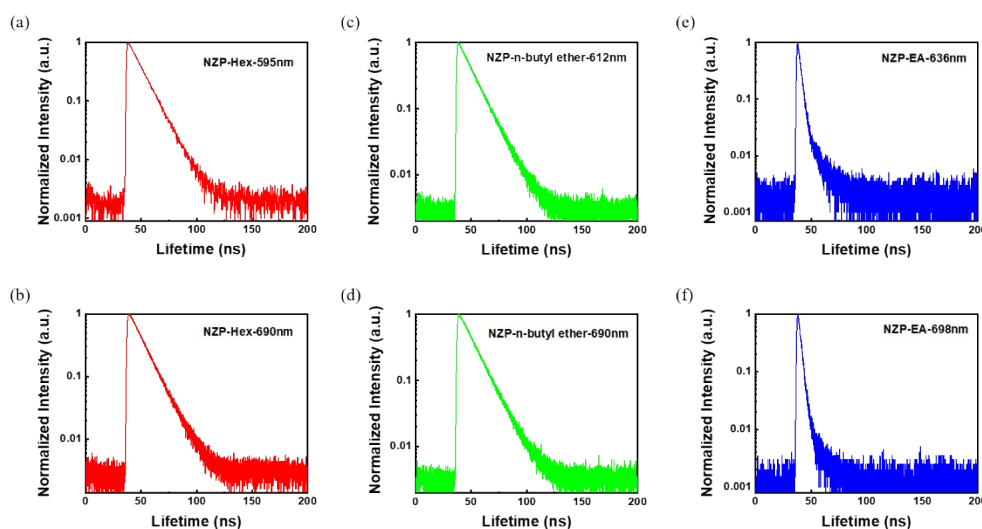

161

162 **Figure S1.** (a) Lifetime of DMAC-NZP in hexane at 595nm(11.6ns). (b) Lifetime of  
163 DMAC-NZP in hexane at 690nm(11.8ns). (c) Lifetime of DMAC-NZP in n-butyl ether  
164 at 612nm(12.5ns). (d) Lifetime of DMAC-NZP in n-butyl ether at 690nm(12.7ns). (e)  
165 Lifetime of DMAC-NZP in ethyl acetate at 639nm(2.0ns). (f) Lifetime of NZP in ethyl  
166 acetate at 698nm(2.1ns).

167

168

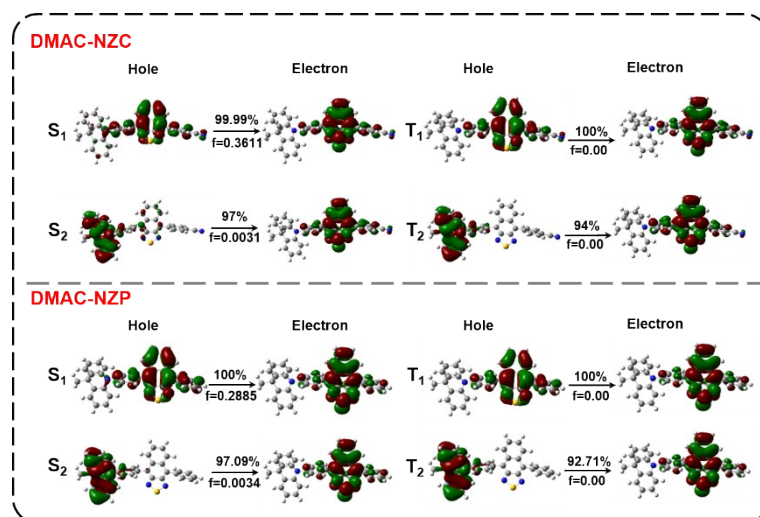

169

170 **Figure S2.** The natural transition orbitals of DMAC-NZC and DMAC-NZP.

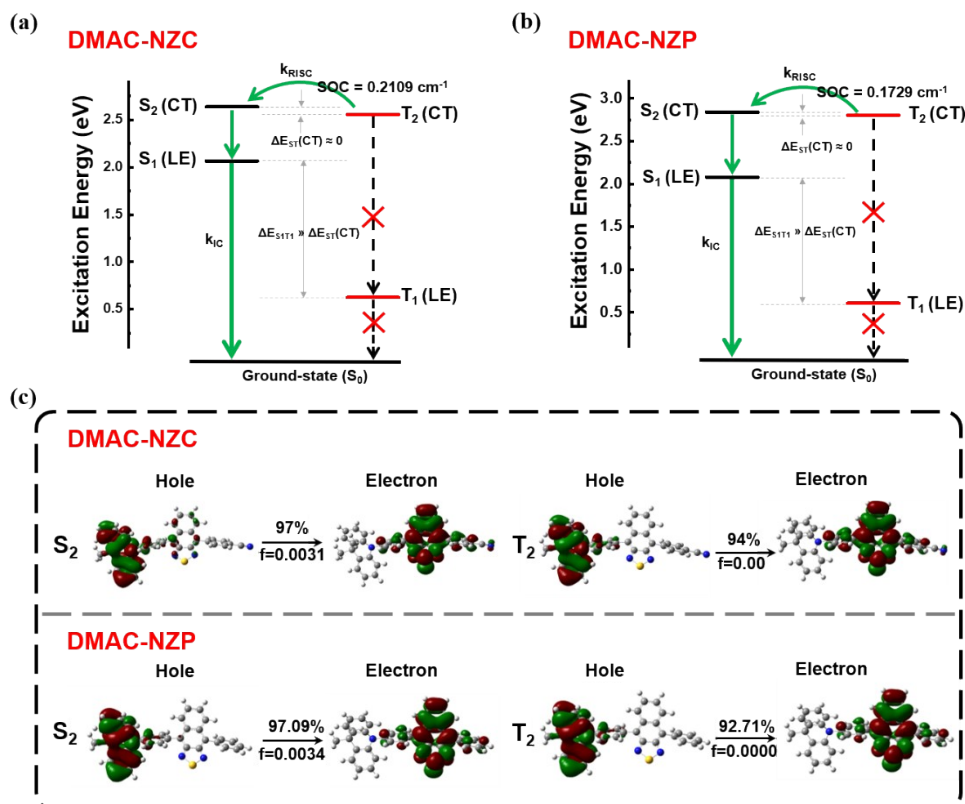

171

172 **Figure S3.** Molecular simulation on the excited states of DMAC-NZC and DMAC-  
 173 NZP. (a) The excitation energy level of DMAC-NZC. (b) The excitation energy level  
 174 of DMAC-NZP.  $k_{IC}$ : internal conversion rate;  $k_{RISC}$ : reverse intersystem crossing rate;  
 175 LE: local excited state; CT: charge-transfer state;  $\Delta E_{ST}$ : singlet–triplet energy splitting.  
 176 (c) The NTO of the  $S_2$  and T excited state of DMAC-NZC and the NTO of the  $S_2$  and  
 177  $T_2$  excited state of DMAC-NZP. The DFT and TDDFT calculations are carried out with  
 178 a Gaussian 09 D. 01 package using the hybrid function m062x under 6-31g (d, p) level.

179

180

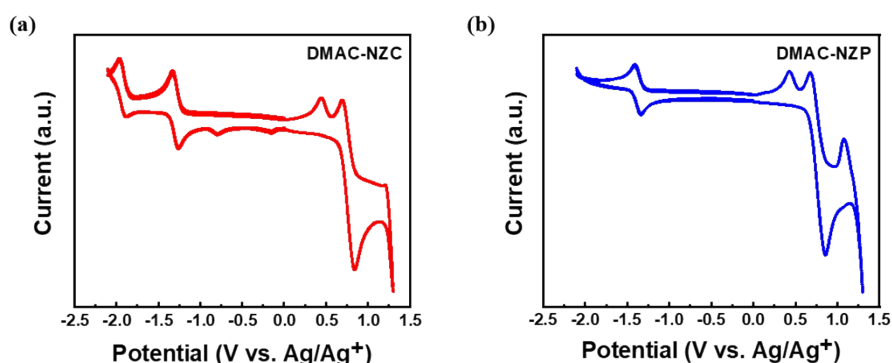

181

182 **Figure S4.** (a) Cyclic voltammograms of DMAC-NZC (HOMO: -5.23eV LUMO: -  
 183 3.47eV), (b) Cyclic voltammograms of DMAC-NZP (HOMO: -5.20eV LUMO: -  
 184 3.39eV) (measured in CH<sub>2</sub>Cl<sub>2</sub> and DMF solution containing 0.1 M tetra-n-  
 185 butylammonium hexafluorophosphate. Scan rate: 100 mV s<sup>-1</sup>).

186

187

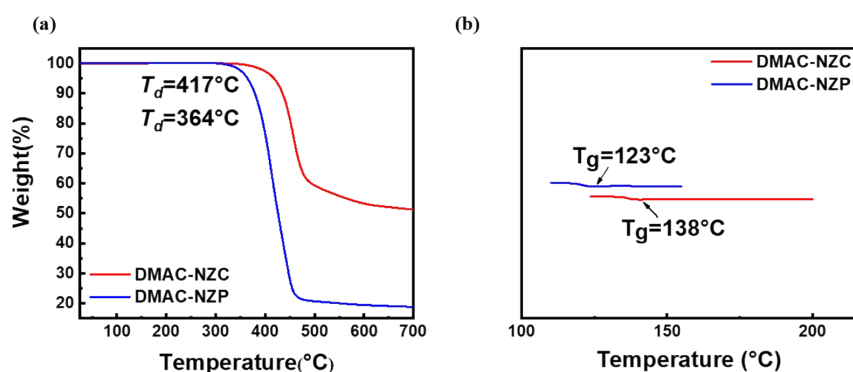

188

189 **Figure S5.** (a) Thermogravimetric analysis (TGA) of DMAC-NZC and DMAC-NZP  
 190 ( $T_d$ : 5% weight loss temperature), (b) Differential scanning calorimetry (DSC) of  
 191 DMAC-NZC and DMAC-NZP ( $T_g$ : glass transition temperatures).

192

193

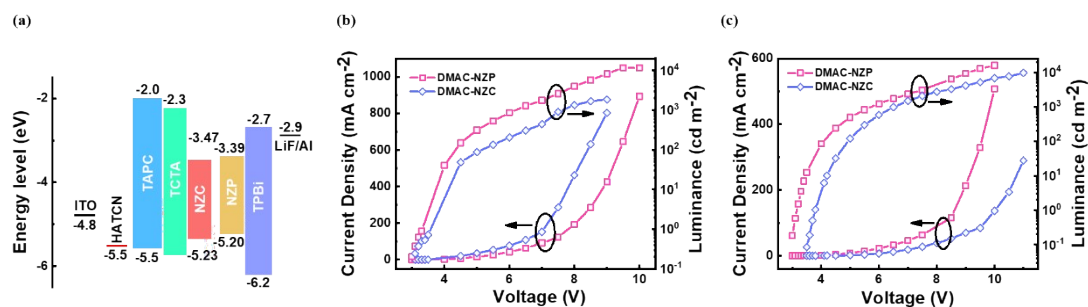

194

195 **Figure S6.** (a) Energy level of OLED structures, (b) Current density-voltage-  
 196 lumiance(J-V-L) spectrogram of non-doped OLEDs, (c) Current density-voltage-

197 lumiance(J-V-L) spectrogram of doped OLEDs. In these structures, TAPC and TPBi  
 198 are used as hole-transport layers and electron-transport layers, respectively, meanwhile,  
 199 TPBi is also used as hole-blocking and exciton-blocking layers. HATCN is used as  
 200 anode buffer layers for hole injection, while LiF is used as cathode buffer layers for  
 201 electron injection.

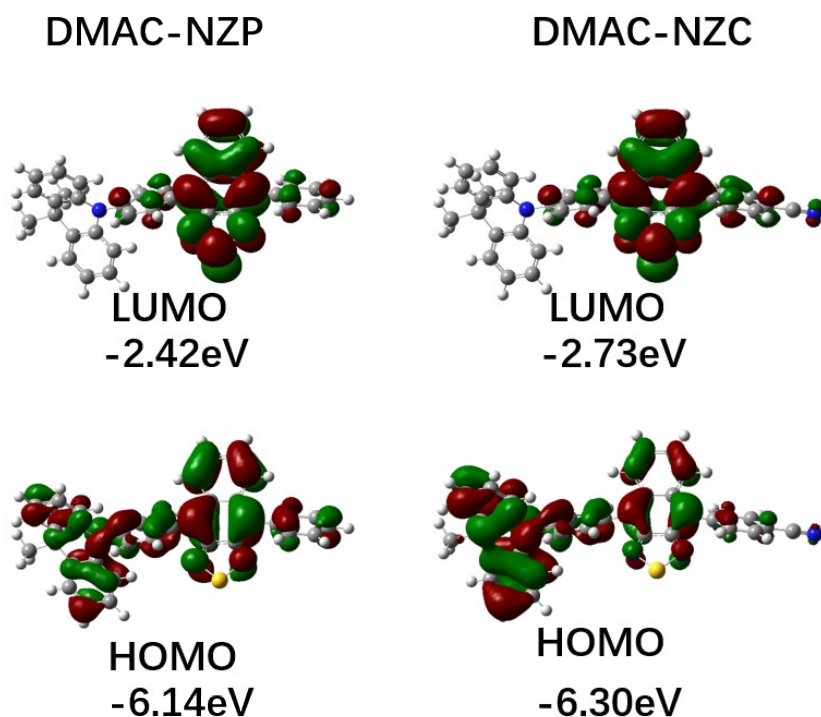

206  
 207 **Figure S7.** The frontier molecular orbital distributions of DMAC-NZC and DMAC-  
 208 NZP.

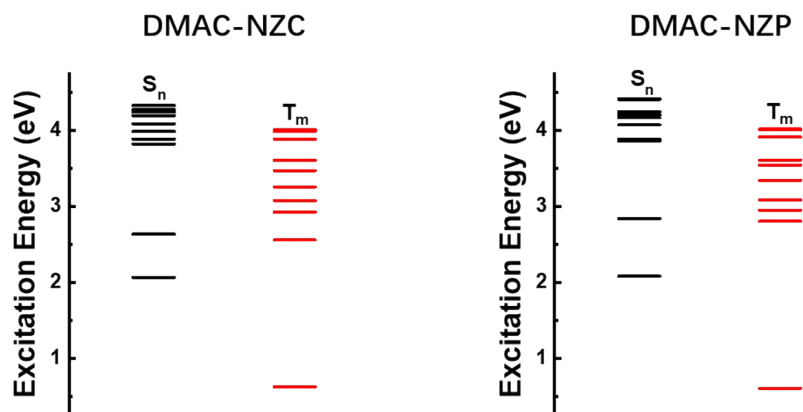

212 **Figure S8.** The excitation energy of DMAC-NZC and DMAC-NZP.

213

214

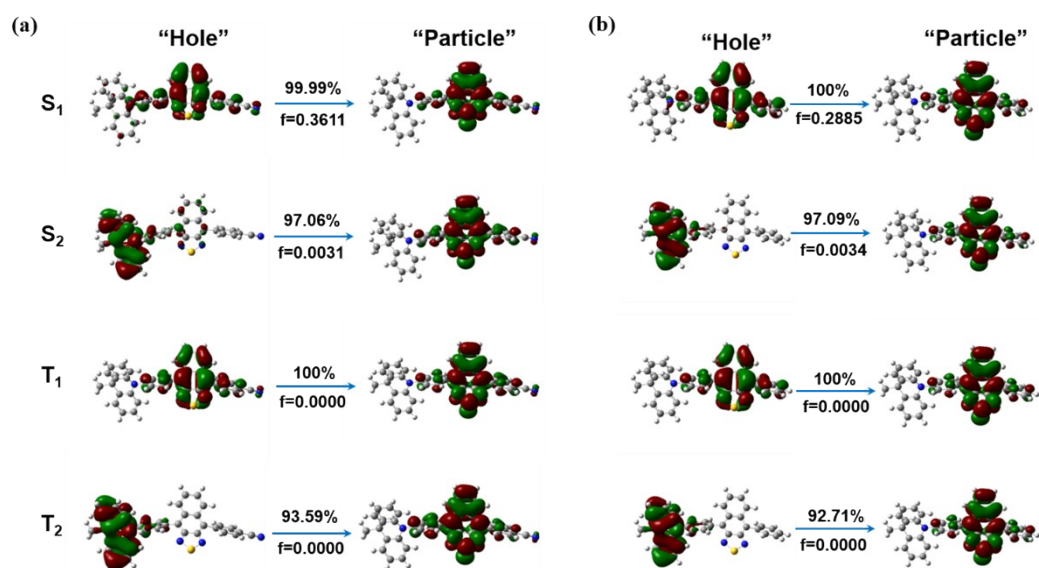

215

216 **Figure S9.** The natural transition orbits of DMAC-NZC and DMAC-NZP.

217

218

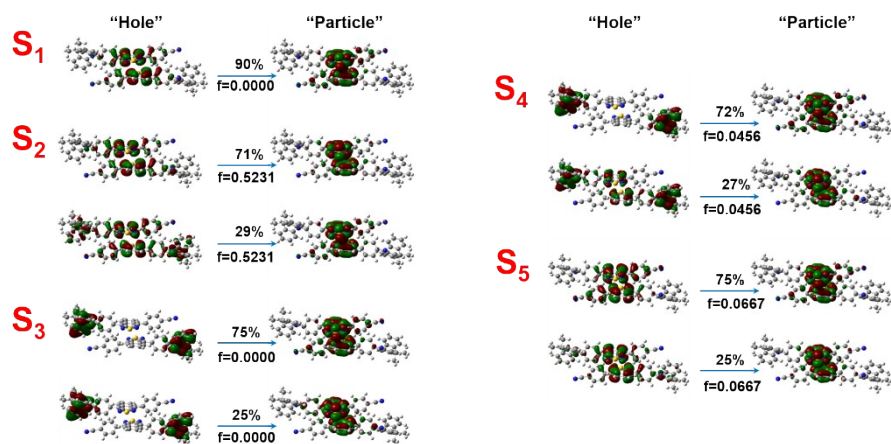

219

220

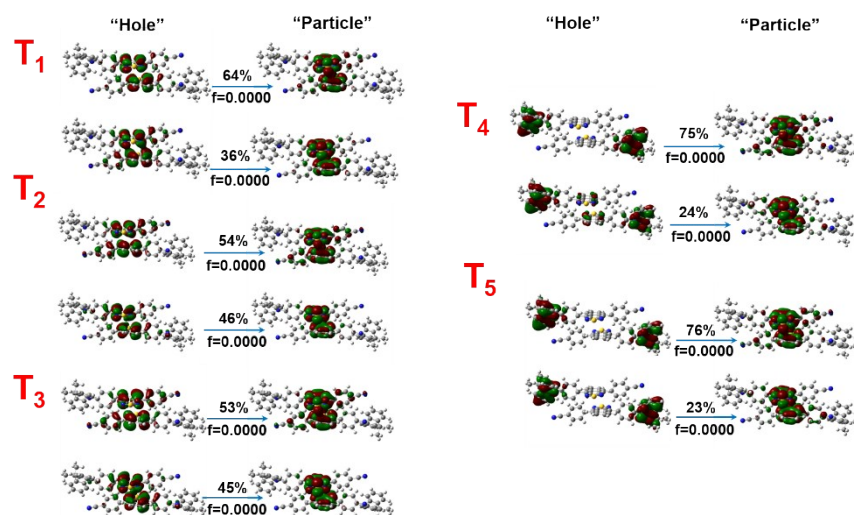

221

222 **Figure S10.** The natural transition orbitals of DMAC-NZC dimer.

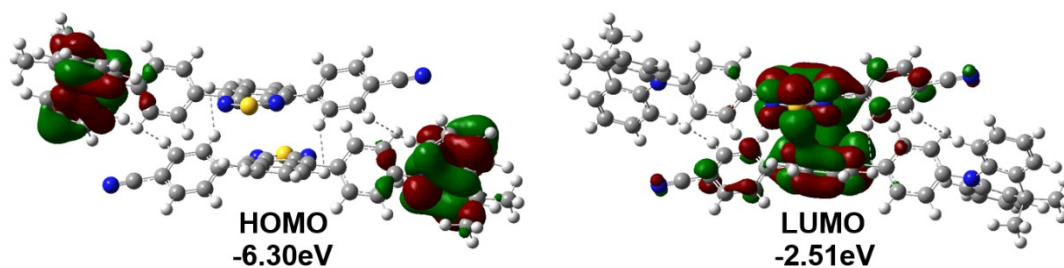

223

224 **Figure S11.** The frontier molecular orbital distributions DMAC-NZC dimer.

225

226

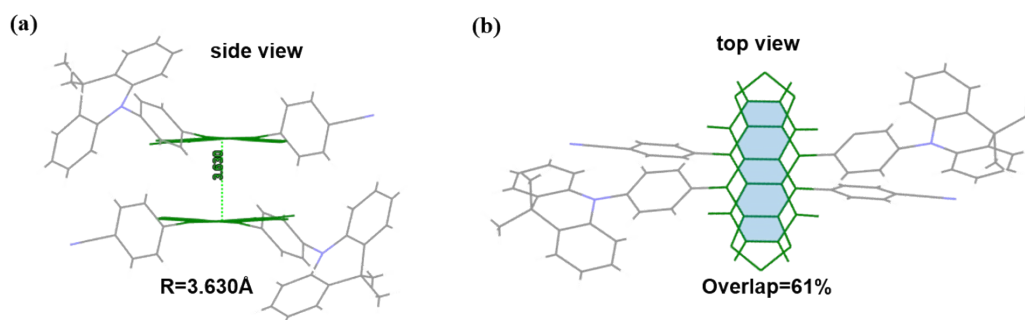

227

228

229 **Figure S12.** (a) The side view of DMAC-NZC dimer, (b) The top view of DMAC-NZP

230

231 dimer.

232

233

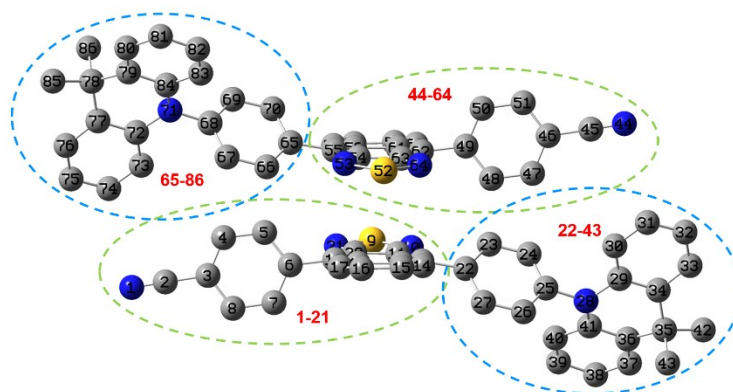

234  
 235 **Figure S13.** The labels of atoms in DMAC-NZC dimer.  
 236  
 237

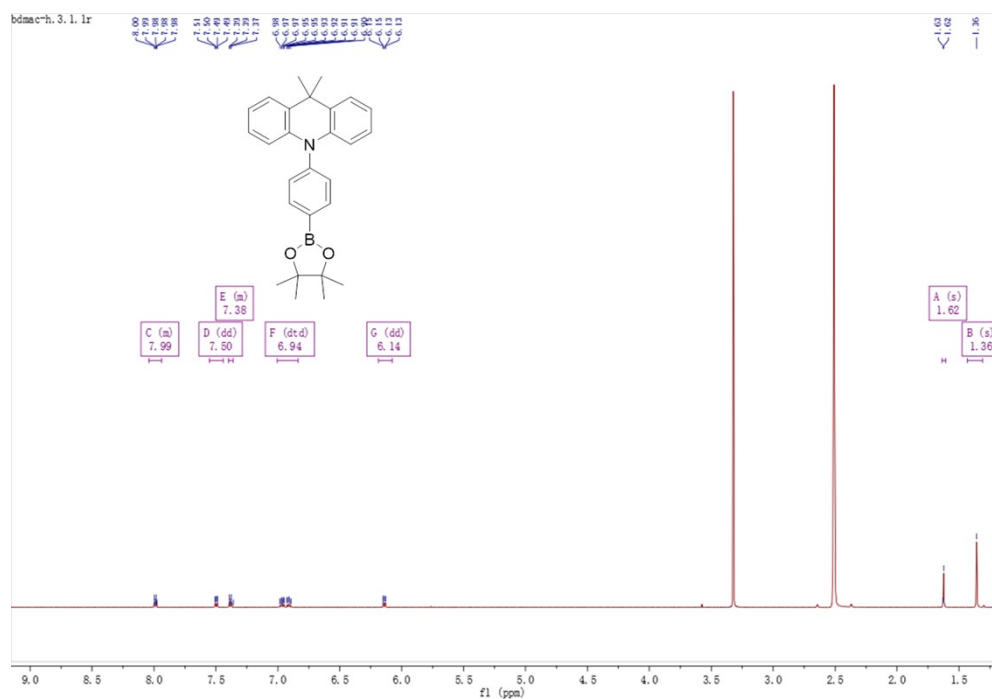

238  
 239 **Figure S14.**  $^1\text{H}$  spectrums of B-DMAC in DMSO.  
 240  
 241

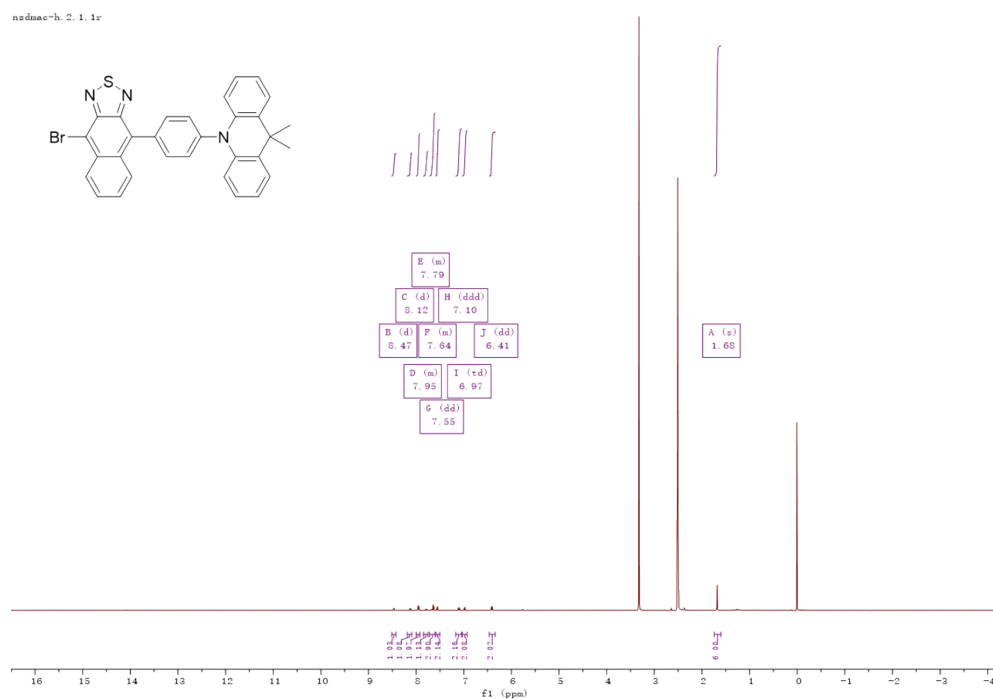

**Figure S15.** <sup>1</sup>H spectrums of NZ-DMAC in DMSO.

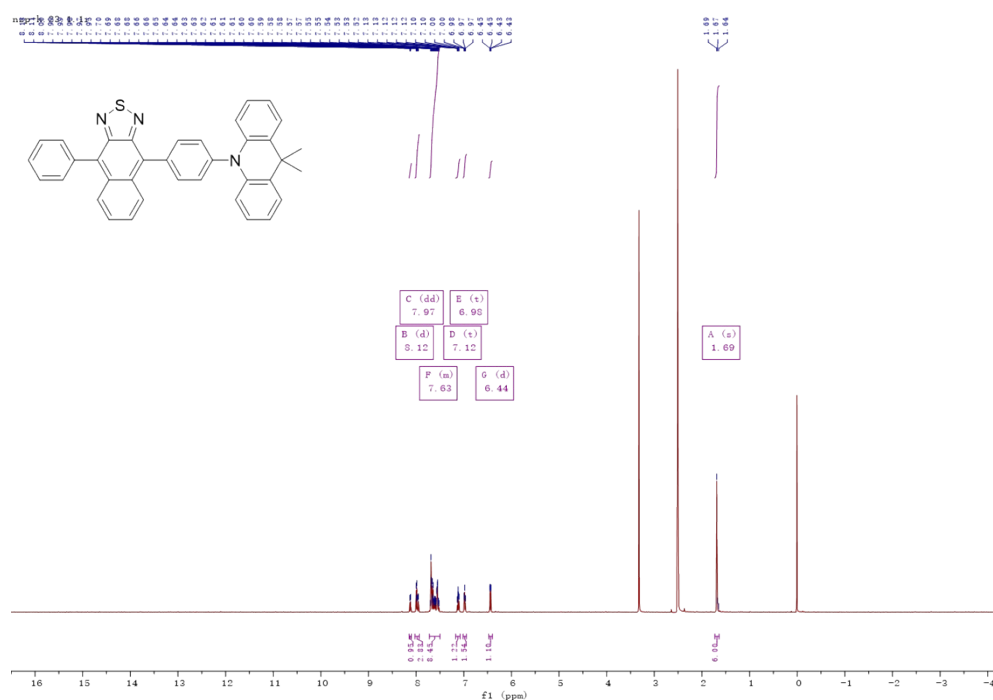

**Figure S16.** <sup>1</sup>H spectrums of DMAC-NZP in DMSO.
